# Supplementary material for: A Topology Structure Based Outer Membrane Proteins Segment Alignment Method
Source: Hindawi journal article supplement (doi:10.1155/2013/541359), 2013-01-01
Supplement: f1 [file 541359.f1.pdf]

**Table S1. Testing dataset.**

| OMP ID     | PDB ID | Num. Subunits | Num. TM Sec. | Datasets |
|------------|--------|---------------|--------------|----------|
| 1.3.01.01. | 1QJP   | 1             | 8            | Testing  |
| 1.3.01.02. | 3QRA   | 1             | 8            | Testing  |
| 1.3.02.01. | 1P4T   | 1             | 8            | Testing  |
| 1.3.04.03. | 3GP6   | 1             | 8            | Testing  |
| 1.3.05.01. | 2ERV   | 1             | 8            | Testing  |
| 1.3.06.01. | 3DZM   | 1             | 8            | Testing  |
| 1.3.08.01. | 1K24   | 1             | 10           | Testing  |
| 1.3.09.01. | 3FID   | 1             | 12           | Testing  |
| 1.3.10.01. | 2WJR   | 1             | 12           | Testing  |
| 1.3.11.01. | 1UYO   | 1             | 12           | Testing  |
| 1.3.12.01. | 1QD6   | 1             | 12           | Testing  |
| 1.3.13.01. | 1TLY   | 1             | 12           | Testing  |
| 1.3.14.01. | 1T16   | 1             | 14           | Testing  |
| 1.3.15.01. | 2IWV   | 1             | 14           | Testing  |
| 1.3.16.01. | 1HXX   | 3             | 48           | Testing  |
| 1.3.16.02. | 2POR   | 3             | 48           | Testing  |
| 1.3.17.01. | 2QDZ   | 1             | 16           | Testing  |
| 1.3.18.01. | 1A0S   | 3             | 54           | Testing  |
| 1.3.19.01. | 3JTY   | 1             | 18           | Testing  |
| 1.3.19.02. | 3RBH   | 1             | 18           | Testing  |
| 1.3.20.01. | 1KMP   | 1             | 22           | Testing  |
| 1.3.21.01. | 2VQI   | 1             | 24           | Testing  |
| 1.3.22.01. | 3EMN   | 1             | 19           | Testing  |
| 1.3.23.01. | 2GR7   | 3             | 15           | Testing  |
| 1.3.24.01. | 1WP1   | 3             | 12           | Testing  |
| 1.3.25.01. | 1PVL   | 1             | 0            | Testing  |
| 1.3.25.02. | 3O44   | 7             | 14           | Testing  |
| 1.3.26.01. | 1UUN   | 8             | 16           | Testing  |
| 1.3.01.01. | 2JMM   | 1             | 8            | Training |
| 1.3.01.02. | 1QJ8   | 1             | 8            | Training |

|            |      |   |    |          |
|------------|------|---|----|----------|
| 1.3.02.01. | 2LHF | 1 | 8  | Training |
| 1.3.07.01. | 1I78 | 1 | 10 | Training |
| 1.3.11.01. | 2QOM | 1 | 12 | Training |
| 1.3.12.01. | 1QD5 | 1 | 12 | Training |
| 1.3.14.01. | 3DWO | 1 | 14 | Training |
| 1.3.15.01. | 2X9K | 1 | 14 | Training |
| 1.3.16.01. | 1OSM | 3 | 48 | Training |
| 1.3.16.02. | 3PRN | 3 | 48 | Training |
| 1.3.18.01. | 1AF6 | 3 | 54 | Training |
| 1.3.19.01. | 2ODJ | 1 | 18 | Training |
| 1.3.20.01. | 1QFG | 1 | 22 | Training |
| 1.3.21.01. | 3OHN | 1 | 24 | Training |
| 1.3.22.01. | 2K4T | 1 | 19 | Training |
| 1.3.23.01. | 3EMO | 3 | 12 | Training |
| 1.3.24.01. | 3PIK | 3 | 12 | Training |
| 1.3.25.01. | 7AHL | 7 | 14 | Training |
| 1.3.25.02. | 1XEZ | 1 | 0  | Training |
